# Supplementary material
Source: PubMed Central journal article supplement (PMC5958371)
Supplement: DS_10.1177_0022034518755697.pdf [file DS_10.1177_0022034518755697.pdf]

## Diabetes Activates Periodontal Ligament Fibroblasts via NF- $\kappa$ B In Vivo

J. Zheng, S. Chen, M.L. Albiero, G.H.A. Vieira, J. Wang, J.Q. Feng, and D.T. Graves

### Appendix

Appendix Table

|                                            | Uninfected       |                 |                  |                  | Infected         |                 |                  |                  |
|--------------------------------------------|------------------|-----------------|------------------|------------------|------------------|-----------------|------------------|------------------|
|                                            | Normoglycemic    |                 | Hyperglycemic    |                  | Normoglycemic    |                 | Hyperglycemic    |                  |
|                                            | Wild-type        | Transgenic      | Wild-type        | Transgenic       | Wild-type        | Transgenic      | Wild-type        | Transgenic       |
| Glucose levels (mg/dl) after STZ injection | 131.4 $\pm$ 9.2  | 143.8 $\pm$ 6.4 | 255.0 $\pm$ 6.2  | 256.6 $\pm$ 12.3 | 130.3 $\pm$ 12.3 | 134.8 $\pm$ 9.5 | 302.0 $\pm$ 22.1 | 269.7 $\pm$ 15.9 |
| Final glucose levels (mg/dl)               | 156.4 $\pm$ 10.4 | 166.2 $\pm$ 6.0 | 370.8 $\pm$ 34.2 | 446.9 $\pm$ 45.3 | 168.5 $\pm$ 9.3  | 161.6 $\pm$ 5.2 | 393.2 $\pm$ 38.7 | 362.7 $\pm$ 30.2 |

Serum glucose levels were measured after STZ injection and at the time of euthanasia.
